# Supplementary material
Source: HighWire-hosted journal article supplement (https://drc.bmj.com/content/12/2/e003905)
Supplement: inline-supplementary-material-1 [file inline-supplementary-material-1.pdf]

**Online Only Supplemental Material****Supplemental Table S1. Original Diabetes Population Risk Tool (DPoRT) Algorithm<sup>1</sup>****Males:**

$$\mu = 10.3062$$

- 0.3629 × hypertension
- 0.3483 × heart disease
- 0.5697 × non-white ethnicity
- 0.0585 × smoker
- + 0.1884 × attended post-secondary
- + 0.1173 × top income quintile
- 0 × (BMI < 23 & age < 45)
- 0.5520 × (23 ≤ BMI < 25 & age < 45)
- 0.9521 × (25 ≤ BMI < 30 & age < 45)
- 1.7162 × (30 ≤ BMI < 35 & age < 45)
- 2.3310 × (35 ≤ BMI & age < 45)
- 1.3602 × (BMI < 23 & age ≥ 45)
- 1.6537 × (23 ≤ BMI < 25 & age ≥ 45)
- 2.0563 × (25 ≤ BMI < 30 & age ≥ 45)
- 2.5513 × (30 ≤ BMI < 35 & age ≥ 45)
- 2.9353 × (35 ≤ BMI & age ≥ 45).

$$\text{Scale} = 0.7994$$

**Females:**

$$\mu = 10.5777$$

- 0.4098 × hypertension
- 0.4528 × non-white ethnicity
- 0.1477 × immigrant
- + 0.1939 × attended post-secondary
- 0 × (BMI < 23 & age < 45)
- 0.7432 × (23 ≤ BMI < 25 & age < 45)
- 1.1521 × (25 ≤ BMI < 30 & age < 45)
- 1.8479 × (30 ≤ BMI < 35 & age < 45)
- 2.0562 × (35 ≤ BMI & age < 45)
- 1.5832 × (BMI = missing & age < 45)
- 0.7100 × (BMI < 23 & 45 ≤ age < 65)
- 1.2338 × (23 ≤ BMI < 25 & 45 ≤ age < 65)
- 1.8357 × (25 ≤ BMI < 30 & 45 ≤ age < 65)
- 2.3742 × (30 ≤ BMI < 35 & 45 ≤ age < 65)
- 2.6631 × (35 ≤ BMI & 45 ≤ age < 65)
- 2.1988 × (BMI = missing & 45 ≤ age < 65)
- 1.5956 × (BMI < 23 & age ≥ 65)
- 1.6144 × (23 ≤ BMI < 25 & age ≥ 65)
- 1.9830 × (25 ≤ BMI < 30 & age ≥ 65)
- 2.2148 × (30 ≤ BMI < 35 & age ≥ 65)

- 2.6448 × (35 ≤ BMI & age ≥ 65)
- 2.4209 × (BMI = missing & age ≥ 65).

Scale = 0.8419

$$m = \frac{\log(\text{follow-up time in days}) - \mu}{\text{scale}}$$

$$p = 1 - \exp(-\exp^m)$$

**Number of diabetes cases** = p \* survey weights

#### References

1. Rosella LC, Lebenbaum M, Li Y, Wang J, Manuel DG. Risk distribution and its influence on the population targets for diabetes prevention. *Preventive medicine*. 2014;58:17-21.

Supplemental Table S2. Observed vs. Predicted Number of Incident Diabetes Cases (2009-2018)

|                  | NHIS           | NHIS +<br>Correction<br>Factor | DPoRT<br>Original | DPoRT Updating             |                           |                                   |                                   |
|------------------|----------------|--------------------------------|-------------------|----------------------------|---------------------------|-----------------------------------|-----------------------------------|
|                  |                |                                |                   | Intercept<br>Recalibration | Logistic<br>Recalibration | Model<br>Extension<br>(Insurance) | Model<br>Extension<br>(Ethnicity) |
|                  | Observed Cases |                                | Predicted Cases   |                            |                           |                                   |                                   |
| <b>Total</b>     | 15,414,818     | 19,268,523                     | 19,480,568        | 16,962,887                 | 35,673,366                | 37,074,992                        | 41,636,738                        |
| <b>Sex</b>       |                |                                |                   |                            |                           |                                   |                                   |
| Males            | 7,434,543      | 9,293,179                      | 10,566,256        | 11,496,762                 | 7,560,204                 | 7,433,133                         | 17,909,864                        |
| Females          | 7,980,275      | 9,975,344                      | 8,914,313         | 5,466,125                  | 28,113,162                | 29,641,859                        | 23,726,874                        |
| <b>Ethnicity</b> |                |                                |                   |                            |                           |                                   |                                   |
| White            | 9,076,029      | 11,345,036                     | 11,286,433        | 11,564,077                 | 24,185,367                | 25,281,810                        | 31,346,650                        |
| Non-White        | 6,310,124      | 7,887,655                      | 8,186,150         | 5,398,810                  | 11,487,999                | 11,793,182                        | 10,290,089                        |
